# Supplementary material
Source: MDPI journal article supplement (https://www.mdpi.com/2571-9637/2/2/32)
Supplement: s1 [file s1]

## Supplementary Materials

### 1. Determination of Carbamation Degree ( $DS_{TDI}$ ) using EDX

The elemental composition of the original CNCs ( $DS_{TDI}=0\%$ ) was determined using EDX (C: 45.9%, O: 52.1%, N: 0.0%, S: 1.2%, Na: 0.8%) and based on it, the elemental composition of proposed carbamated samples of  $DS_{TDI}$  up to 33% was calculated to construct **Figure S1**. As a result, the  $DS_{TDI}$  for any carbamated CNC sample can be calculated using the equation in the figure after its N/C molar ratio is determined using EDX (**Figure S2**).

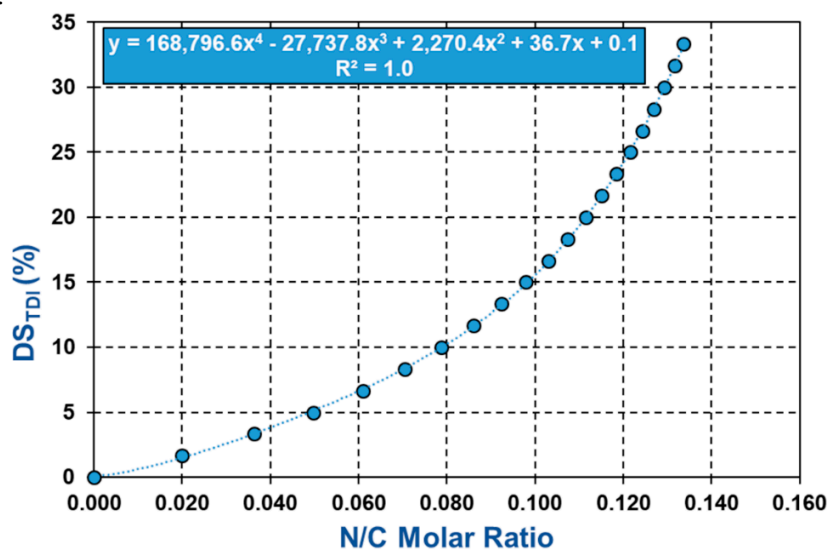

**Figure S1.** The estimation of  $DS_{TDI}$  of carbamated CNCs using the N/C molar ratio obtained from EDX.

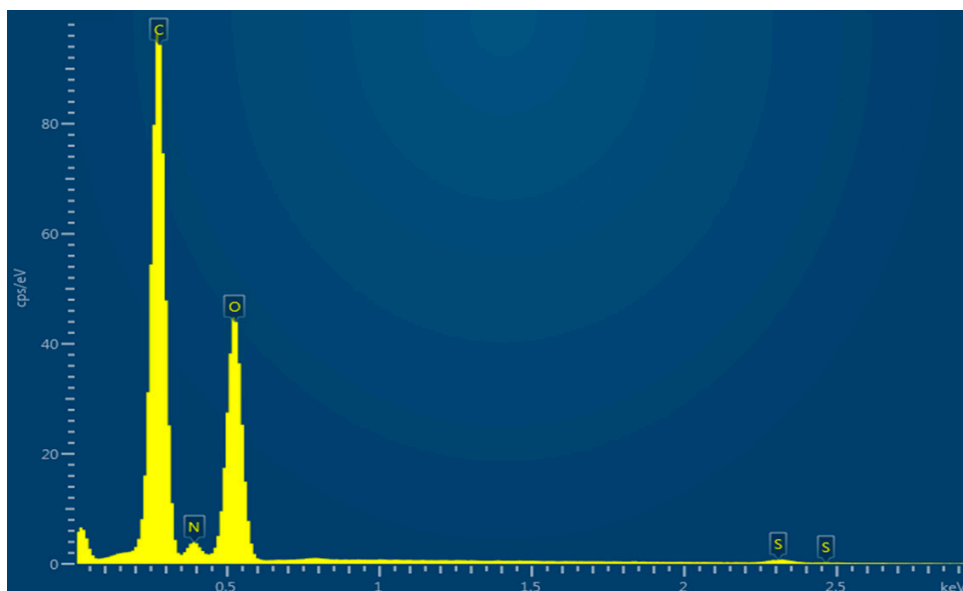

**Figure S2.** An example of an EDX measurement of a carbamated CNC sample.

**Table S1.** The estimation of DS<sub>TDI</sub> using EDX results based on N/C, N/O, and C/O Ratios.

| T<br>(°C) | Using N/C          |                          | Using N/O          |                          | Using C/O          |                          |
|-----------|--------------------|--------------------------|--------------------|--------------------------|--------------------|--------------------------|
|           | N/C Molar<br>Ratio | DS <sub>TDI</sub><br>(%) | N/O Molar<br>Ratio | DS <sub>TDI</sub><br>(%) | C/O Molar<br>Ratio | DS <sub>TDI</sub><br>(%) |
| 35        | 0.045±0.001        | 4.5±0.1                  | 0.075±0.002        | 5.0±0.1                  | 1.648±0.004        | 4.9±0.1                  |
| 55        | 0.077±0.001        | 9.6±0.2                  | 0.138±0.002        | 9.9±0.2                  | 1.792±0.007        | 10.1±0.1                 |
| 75        | 0.096±0.001        | 14.2±0.3                 | 0.182±0.001        | 13.7±0.1                 | 1.909±0.006        | 14.7±0.3                 |

## 2. Determination of Carbamation Degree (DS<sub>TDI</sub>) using EDX, Elemental Analysis, and Mass Yield

The carbamation degree (DS<sub>TDI</sub>) was determined using EDX and elemental analysis by monitoring the change in the N/C molar ratio. It was determined using mass yield (MY) following this equation:

$$DS_{TDI} = \frac{mmol\ TDI}{mmol\ CNC\ Hydroxyls} = \frac{(MY - 100)/17.4}{3 * (mass\ CNCs(mg)/162)} * 100\%$$

The estimated DS<sub>TDI</sub> values from the three methods were comparable confirming the accuracy of all methods. However, the values obtained using mass yield were slightly lower due to mass losses during the carbamation process.

**Table S2.** The estimation of DS<sub>TDI</sub> using EDX, Elemental Analysis, and Mass Yield.

| T<br>(°C) | Using EDX          |                          | Using Elemental Analysis* |                       | Using Mass Yield |                       |
|-----------|--------------------|--------------------------|---------------------------|-----------------------|------------------|-----------------------|
|           | N/C Molar<br>Ratio | DS <sub>TDI</sub><br>(%) | N/C Molar<br>Ratio        | DS <sub>TDI</sub> (%) | Mass Yield (%)   | DS <sub>TDI</sub> (%) |
| 35        | 0.045±0.001        | 4.5±0.1                  | 0.059±0.003               | 4.8±0.3               | 112.4±0.6        | 3.8±0.2               |
| 55        | 0.077±0.001        | 9.6±0.2                  | 0.093±0.003               | 9.4±0.5               | 128.4±2.1        | 8.8±0.7               |
| 75        | 0.096±0.001        | 14.2±0.3                 | 0.115±0.000               | 13.7±0.1              | 143.5±1.8        | 13.5±0.5              |

\*Elemental Analysis was performed using Vario MICRO V3.1.1 CHNS-Modus (Elementar Analysensysteme GmbH, Germany)
